# Supplementary material
Source: MDPI journal article supplement (https://www.mdpi.com/2410-3888/9/3/86)
Supplement: s1 [file s1]

Table S1. Fish detection at each sampling point in Wanlv Lake based on eDNA metabarcoding technology.

| Order         | Family        | Genus                     | Sampling site |   |   |   |   |   |   |   |   |    |
|---------------|---------------|---------------------------|---------------|---|---|---|---|---|---|---|---|----|
|               |               |                           | 1             | 2 | 3 | 4 | 5 | 6 | 7 | 8 | 9 | 10 |
| Cypriniformes | Nemacheilidae | <i>Lefua</i>              |               |   |   |   |   |   |   |   |   |    |
|               |               | <i>Cirrhinus</i>          |               | + | + | + | + | + | + | + | + | +  |
|               |               | <i>Decapterus</i>         | +             | + | + | + |   |   |   | + |   | +  |
|               |               | <i>Rhodeus</i>            |               |   |   | + | + | + |   |   |   |    |
|               |               | <i>Hypophthalmichthys</i> | +             | + | + | + | + | + |   | + |   | +  |
|               |               | <i>Hemiculter</i>         | +             | + |   | + | + | + | + | + | + | +  |
|               |               | <i>Cyprinus</i>           | +             | + |   | + | + | + | + | + | + | +  |
|               |               | <i>Squaliobarbus</i>      | +             | + |   |   | + | + |   | + | + | +  |
|               |               | <i>Ptychidio</i>          | +             | + | + | + | + | + | + | + | + | +  |
|               |               | <i>Metzia</i>             |               | + | + | + | + | + | + | + | + | +  |
|               |               | <i>Xenocypris</i>         |               | + |   | + | + |   |   | + |   |    |
|               |               | <i>Acrossocheilus</i>     | +             | + | + | + | + | + | + | + | + | +  |
|               |               | <i>Opsariichthys</i>      | +             | + | + | + |   | + | + | + | + |    |
|               |               | <i>Megalobrama</i>        |               | + |   | + |   | + | + | + | + |    |
|               |               | <i>Sinocyclocheilus</i>   | +             |   |   |   | + |   | + | + | + | +  |
|               |               | <i>Sarcocheilichthys</i>  |               |   |   | + | + | + |   | + | + |    |
|               |               | <i>Carassius</i>          |               | + |   |   |   | + | + | + | + | +  |
|               | Cyprinidae    | <i>Mylopharyngodon</i>    |               | + |   |   |   |   |   |   | + | +  |
|               |               | <i>Chanodichthys</i>      |               | + |   |   |   |   |   |   |   |    |
|               |               | <i>Culter</i>             | +             | + |   | + |   | + |   |   |   |    |
|               |               | <i>Hemibarbus</i>         |               |   |   | + | + |   |   |   |   |    |
|               |               | <i>Pseudogobio</i>        |               |   |   |   | + |   |   |   |   |    |
|               |               | <i>Osteochilus</i>        | +             |   | + |   |   |   |   |   |   | +  |
|               |               | <i>Squalidus</i>          |               | + |   | + | + |   |   |   |   |    |
|               |               | <i>Garra</i>              |               |   |   | + |   |   |   |   |   |    |
|               |               | <i>Bangana</i>            |               |   |   |   |   | + |   |   |   |    |
|               |               | <i>Tinca</i>              |               |   |   |   |   |   |   |   |   | +  |
|               |               | <i>Pseudorasbora</i>      |               |   |   |   |   |   |   | + | + |    |
|               |               | <i>Microphysogobio</i>    |               |   |   | + | + |   |   |   |   |    |
|               |               | <i>Labeo</i>              |               | + |   |   | + |   |   |   |   |    |
|               |               | <i>Saurogobio</i>         |               |   |   |   |   |   |   |   |   | +  |
|               |               | <i>Gymnocypris</i>        |               |   |   |   |   |   |   |   | + |    |
|               |               | <i>Stenobranchius</i>     | +             |   | + |   | + |   |   | + |   | +  |
|               |               | <i>Labiobarbus</i>        |               |   |   |   |   |   |   |   |   | +  |
|               | Cobitidae     | <i>Sinibotia</i>          |               |   |   |   |   |   |   | + |   |    |
|               |               | <i>Paramisgurnus</i>      |               |   |   | + | + | + |   |   |   |    |
|               |               | <i>Cobitis</i>            |               |   |   |   | + | + |   | + |   |    |
| Perciformes   | Carangidae    | <i>Trachurus</i>          | +             | + | + |   | + | + |   | + | + | +  |
|               |               | <i>Trachinotus</i>        |               |   |   |   |   |   |   |   |   | +  |
|               | Serranidae    | <i>Plectropomus</i>       | +             |   |   |   |   |   |   | + |   |    |
|               |               | <i>Epinephelus</i>        | +             |   | + |   | + | + |   | + | + | +  |

|  |                    |                            |   |   |   |   |   |   |   |   |
|--|--------------------|----------------------------|---|---|---|---|---|---|---|---|
|  | sinipercidae       | <i>Siniperca</i>           | + |   | + | + | + |   | + | + |
|  | Cichlidae          | <i>Oreochromis</i>         | + | + | + | + | + | + | + | + |
|  | Lateolabracidae    | <i>Lateolabrax</i>         |   |   | + |   |   |   |   |   |
|  | Gerreidae          | <i>Gerres</i>              |   |   |   |   |   |   | + | + |
|  |                    | <i>Mugilogobius</i>        |   |   |   |   |   |   |   | + |
|  | Gobiidae           | <i>Rhinogobius</i>         | + | + | + | + | + | + | + | + |
|  |                    | <i>Amblychaeturichthys</i> |   |   |   |   | + |   |   | + |
|  | Sciaenidae         | <i>Larimichthys</i>        |   |   |   |   | + |   |   | + |
|  | Channidae          | <i>Channa</i>              |   | + |   |   |   |   |   |   |
|  | Siganidae          | <i>Siganus</i>             |   |   |   |   |   |   |   | + |
|  | Ambassidae         | <i>Ambassis</i>            |   |   |   |   |   | + |   |   |
|  | Sillaginidae       | <i>Sillago</i>             | + |   |   |   |   |   |   |   |
|  | Channichthyidae    | <i>Chionodraco</i>         |   |   |   |   |   |   | + |   |
|  | Scombridae         | <i>Euthynnus</i>           |   |   |   |   |   |   |   | + |
|  | Mastacembelidae    | <i>Mastacembelus</i>       |   |   |   |   |   |   |   | + |
|  | Plotosidae         | <i>Plotosus</i>            |   | + |   |   |   |   |   |   |
|  |                    | <i>silurus</i>             |   |   |   |   | + |   |   | + |
|  | Siluridae          | <i>Pterocryptis</i>        | + |   |   |   |   |   | + | + |
|  | Loricariidae       | <i>Pterygoplichthys</i>    |   |   |   |   |   |   |   | + |
|  | Craboglanididae    | <i>Cranoglanis</i>         |   |   |   |   |   |   |   | + |
|  | Clariidae          | <i>Clarias</i>             | + | + | + | + | + | + | + | + |
|  |                    | <i>Hemibagrus</i>          |   |   |   |   | + | + |   |   |
|  | Bagridae           | <i>Tachysurus</i>          | + |   |   |   | + |   | + | + |
|  | Ictaluridae        | <i>Ictalurus</i>           | + |   |   |   |   |   |   |   |
|  | Engraulidae        | <i>Coilia</i>              |   |   |   |   |   |   |   | + |
|  |                    | <i>Konosirus</i>           |   |   |   |   |   |   | + |   |
|  | Clupeidae          | <i>Sardinella</i>          |   |   |   |   |   |   |   | + |
|  |                    |                            |   |   |   |   |   |   | + | + |
|  | Anguillidae        | <i>Anguilla</i>            |   |   |   |   | + |   |   |   |
|  | Muraenesocidae     | <i>Muraenesox</i>          |   |   |   |   |   |   |   | + |
|  | Nettastomatidae    | <i>Nettastoma</i>          | + |   |   |   |   |   | + | + |
|  |                    | <i>Bolinichthys</i>        |   |   |   |   |   |   | + |   |
|  | Myctophidae        | <i>Diaphus</i>             |   |   |   |   | + |   |   |   |
|  | Mugiliformes       | Mugilidae                  |   |   |   |   |   |   |   | + |
|  | Cyprinodontiformes | Poeciliidae                | + |   |   |   | + |   |   | + |
|  | Acipenseriformes   | Acipenseridae              |   |   |   |   |   |   |   | + |
|  | Scorpaeniformes    | Sebastidae                 |   |   |   |   |   |   |   | + |
|  | Hexanchiformes     | Chlamydoselachidae         | + |   |   |   |   |   |   | + |
|  | Pleuronectiformes  | Cynoglossus                |   |   |   |   |   |   |   | + |
|  | Tetraodontiformes  | Tetraodontidae             | + |   |   |   |   |   |   |   |
|  | Aulopiiformes      | Synodontidae               |   |   |   |   |   |   | + |   |
|  | Lophiiformes       | Lophiidae                  | + |   |   |   | + |   | + |   |
|  | Synbranchiformes   | Synbranchidae              |   |   |   | + | + | + | + | + |

Note: +indicated that the fish was detected at the sampling site.
